# Supplementary material
Source: Springer Nature journal article supplement (https://www.springermedizin.de/resource/supplementary/12902_2009_91_MOESM1_ESM.pdf/9515474)

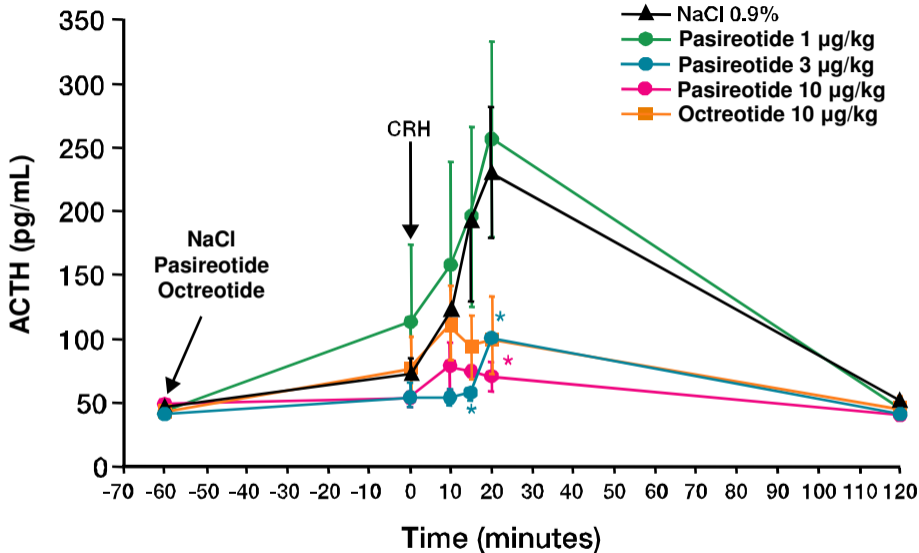

\*  $P < 0.05$  versus NaCl

Supplement: MOESM1 [file 9515474]
